# Supplementary material for: Moisture-responsive films consisting of luminescent polyoxometalates and agarose
Source: Royal Society of Chemistry journal article supplement (doi:10.1039/c5tc00421g), 2015-01-01
Supplement: c5tc00421g1.pdf [file c5tc00421g1.pdf]

## Moisture-responsive Films Consisted of Luminescent Polyoxometalate and Agarose

Yun-Feng Qiu,<sup>‡a</sup> Hong Liu,<sup>‡b</sup> Jian-Xun Liu,<sup>‡b</sup> Chen Zhang,<sup>e</sup> Zhuo Ma,<sup>d</sup> Ping-An  
Hu\*<sup>a</sup> and Guang-Gang Gao\*<sup>bc</sup>,

<sup>a</sup> State Key Laboratory of Robotics and System (HIT), Harbin Institute of Technology,  
Harbin, Heilongjiang 150080, China. E-mail: [hupa@hit.edu.cn](mailto:hupa@hit.edu.cn)

<sup>b</sup> Department of Chemistry, College of Pharmacy, Jiamusi University, Jiamusi,  
Heilongjiang, 154007, China. E-mail: [gaogg@jmsu.edu.cn](mailto:gaogg@jmsu.edu.cn)

<sup>c</sup> Department of Chemistry, Changchun Normal University, Changchun, 130032,  
China

<sup>d</sup> School of Life Science and Technology, Harbin Institute of Technology, 92 West  
Dazhi Street, Harbin, Heilongjiang, 150001, P.R. China.

<sup>e</sup> Department of Materials Science and Engineering, University of California,  
Berkeley, CA 94720-1760

---

### Contents

---

|                 |                                                                  |
|-----------------|------------------------------------------------------------------|
| <b>Fig. S1</b>  | Luminescence spectra as a function of EuW <sub>10</sub> contents |
| <b>Fig. S2</b>  | FTIR spectra of agarose, EuW <sub>10</sub> , and composite film  |
| <b>Table S1</b> | The assignments of FTIR spectra                                  |
| <b>Fig. S3</b>  | Raman spectra of EuW <sub>10</sub> and composite film            |
| <b>Fig. S4</b>  | Transmittance spectra of composite film                          |
| <b>Fig. S5</b>  | Optical images of composite film under day light and UV lamp     |
| <b>Fig. S6</b>  | Elemental mapping of the composite film                          |
| <b>Fig. S7</b>  | SEM images of EuW <sub>10</sub> /Agarose composite film          |
| <b>Fig. S8</b>  | TEM images of EuW <sub>10</sub> /Agarose composite film          |
| <b>Fig. S9</b>  | UV-vis spectra as a function of illumination time                |
| <b>Fig. S10</b> | Crystal structure of HoW <sub>10</sub>                           |
| <b>Fig. S11</b> | TA photoluminescence probing                                     |

---

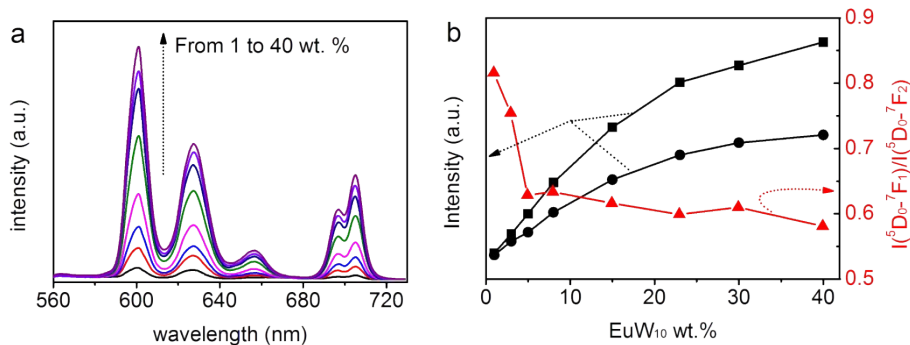

**Fig. S1** (a) The luminescence spectra were measured as a function of EuW<sub>10</sub> contents from 1 to 40 wt. %. (b) The plots of the intensity of <sup>5</sup>D<sub>0</sub> → <sup>7</sup>F<sub>1</sub> (black square), <sup>5</sup>D<sub>0</sub> → <sup>7</sup>F<sub>2</sub> (red circle), and the ratio of I(<sup>5</sup>D<sub>0</sub> → <sup>7</sup>F<sub>1</sub>)/I(<sup>5</sup>D<sub>0</sub> → <sup>7</sup>F<sub>2</sub>) (black triangle) against EuW<sub>10</sub> contents ranging from 1 to 40 wt. %.

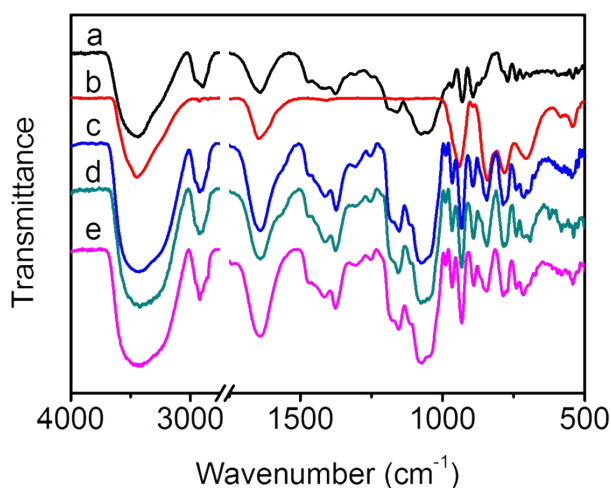

**Fig. S2** FTIR spectra of (a) agarose, (b) EuW<sub>10</sub> crystalline powders, (c) as-prepared EuW<sub>10</sub>/agarose composite film (7 wt.%), (d) irradiated film by 2 Kw UV lamp for 10 min, and (e) recovered film after exposure to 78 RH%.

**Table S1** The assignments of infrared spectra of EuW<sub>10</sub> in its solid state, the as-prepared composite film, and the film irradiated by 2 Kw UV for 10 min. The unit of wavenumber is cm<sup>-1</sup>.

| Assignments         | Solid state | As-prepared | Irradiated  | Recovered   |
|---------------------|-------------|-------------|-------------|-------------|
| W = O <sub>d</sub>  | 942         | Overlapping | Overlapping | Overlapping |
| W-O <sub>b</sub> -W | 841         | 845         | 844         | 845         |
| W-O <sub>c</sub> -W | 781         | 788         | 785         | 787         |
|                     | 705         | 697         | 692         | 696         |

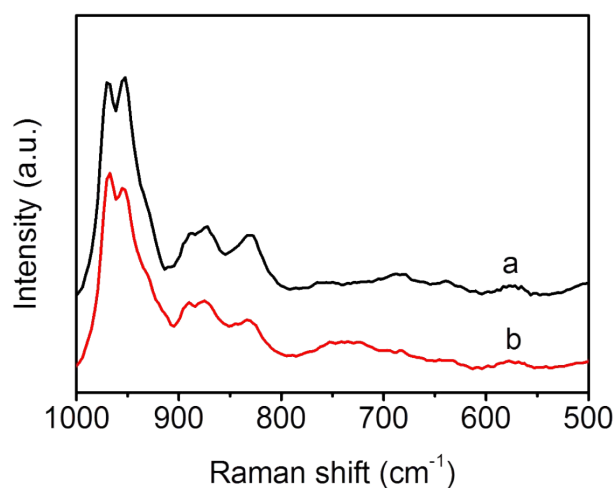

**Fig. S3** (a) Raman spectra of EuW<sub>10</sub> crystalline powders, and (b) as-prepared EuW<sub>10</sub>/agarose composite film (7 wt.%).

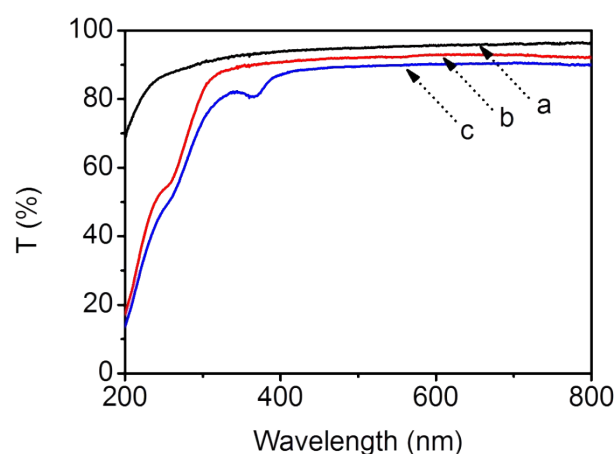

**Fig. S4** Transmittance spectra of the Agarose (a) and EuW<sub>10</sub>/Agarose composite films before (b) and after (c) irradiation by 2 Kw UV lamp for 10 min.

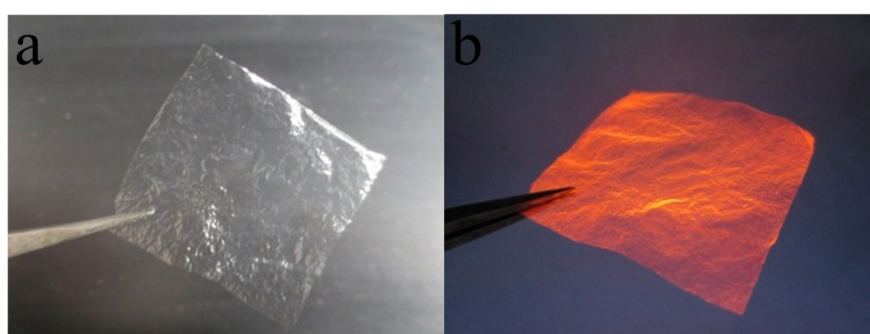

**Fig. S5** Optical images of composite film under day light (a) and UV lamp (b). The composite film can peel off from ITO substrate to form free-standing film. The red luminescence originated from EuW<sub>10</sub> is clear to see under UV light.

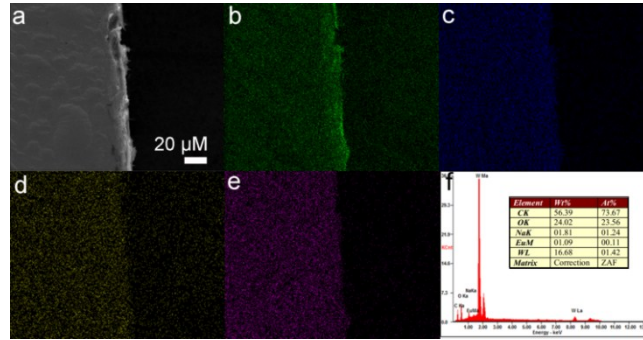

**Fig. S6** Elemental mapping of the composite film. SEM image on Si substrate (a), elements distributions of C (b), Na (c), Eu (d), and W (e). (f) EDX of corresponding region. Inset is the atomic percentage of all elements. Na, Eu, W, and O come from  $\text{EuW}_{10}$ , and C and partial O are from agarose, respectively.

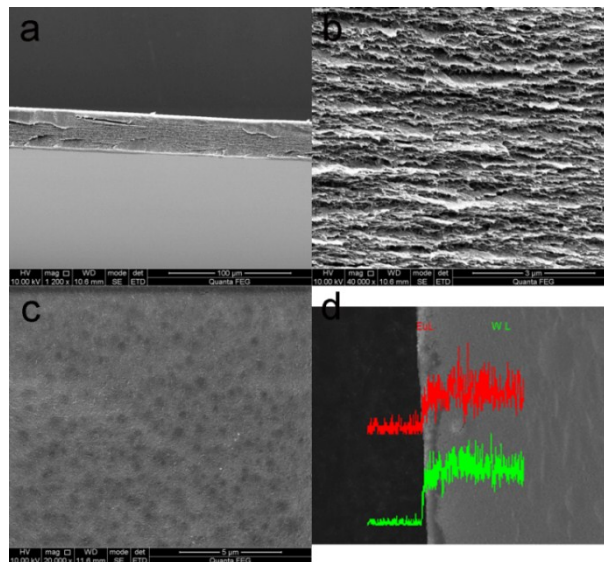

**Fig. S7** SEM cross-sectional images of composite film at (a) low magnification and (b) high magnification. The thickness is ca.  $40 \mu\text{m}$  in this batch, which can be tuned by adjusting the dropping volume or concentration of stock solution. The surface morphology of  $\text{EuW}_{10}/\text{Agarose}$  is shown in (c), in which the black dots are caused by the electron beam damage. The surface is smooth without any obvious aggregation. (d) EDS result of line spectra of Eu and W elements in composite film. The increase of elemental signals is a direct proof for the incorporation of  $\text{EuW}_{10}$  in composite film comparing to the Si substrate (Dark gray region).

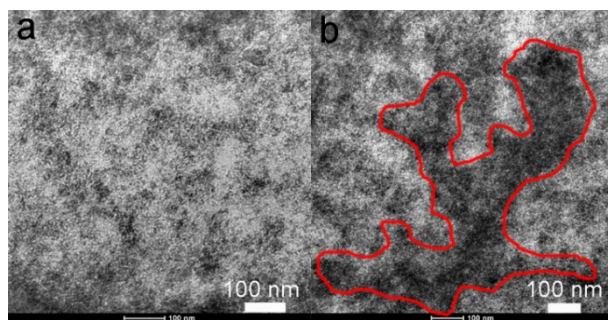

**Fig. S8** TEM images of the composite films with 7 wt.% (a) and 30 wt.%  $\text{EuW}_{10}$  contents.

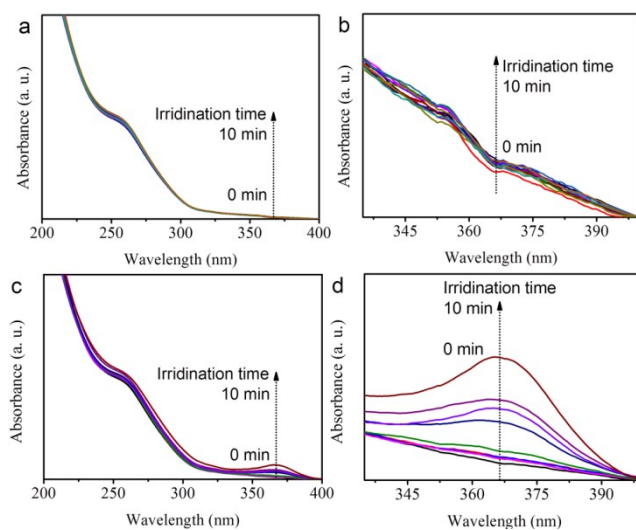

**Fig. S9** UV-vis spectra of  $\text{EuW}_{10}$ /agarose composite film on quartz substrate as a function of illumination time by 125 w (a and b) and 2 Kw UV (c and d) lamps. All curves are almost overlapping in the case of illumination by 125 w UV lamp, however, a new peak at 365 nm was increased gradually under illumination by 2 Kw UV lamp.

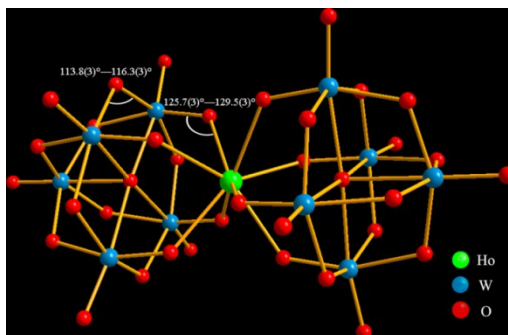

**Fig. S10** Crystal structure of  $\text{HoW}_{10}$ , which is the isostructure of  $\text{EuW}_{10}$ . The W–O–W bond angle is between  $113.8(3)$  to  $116.3(3)^\circ$ ; the Ho–O–W bond angles is between  $125.7(3)$  to  $129.5(3)^\circ$ . It should be noted that the crystal structure of  $\text{HoW}_{10}$  is drawn according to the CIF information in previous work. <sup>1</sup>

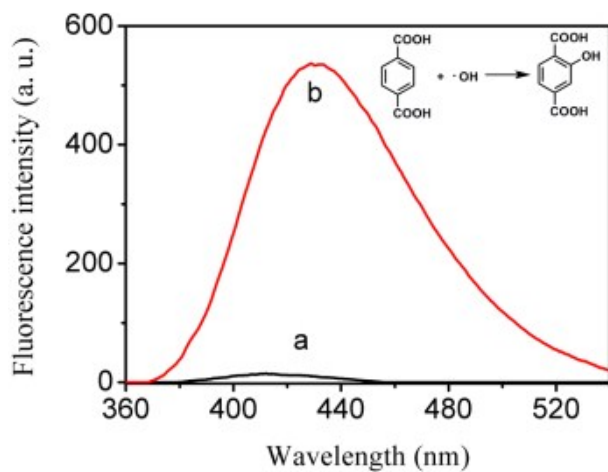

**Fig. S11** Luminescence spectra changes of TA solution ( $2 \times 10^{-3}$  M) in the presence of different amount of 7 wt% EuW<sub>10</sub>/agarose composite. (a) 0 mg and (b) 20 mg at room temperature initially and after irradiation by 2 Kw UV lamp for 10 min, respectively.

1. Y.-Y. Li, F. Gao, J. E. Beves, Y.-Z. Li and J.-L. Zuo, *Chem. Commun.*, 2013, **49**, 3658-3660.
